# Supplementary material for: Genetic dissection of QTLs associated with spikelet-related traits and grain size in sorghum
Source: PubMed Central journal article supplement (PMC8087780; doi:10.1038/s41598-021-88917-x), 2021-04-30
Supplement: 41598_2021_88917_MOESM1_ESM.pdf [file 41598_2021_88917_MOESM1_ESM.pdf]

## **Supplementary Information**

Title:

**Genetic dissection of QTLs associated with spikelet-related traits and grain size in sorghum**

Authors:

**Hideki Takanashi<sup>1,\*</sup>, Mitsutoshi Shichijo<sup>1</sup>, Lisa Sakamoto<sup>1</sup>, Hiromi Kajiya-Kanegae<sup>1,#</sup>, Hiroyoshi Iwata<sup>1</sup>, Wataru Sakamoto<sup>2</sup>, Nobuhiro Tsutsumi<sup>1,\*</sup>**

<sup>1</sup>Graduate School of Agricultural and Life Sciences, The University of Tokyo, 1-1-1 Yayoi, Bunkyo-ku, Tokyo 113-8657, Japan

<sup>2</sup>Institute of Plant Science and Resources, Okayama University, Kurashiki, Okayama 710-0046, Japan

<sup>#</sup>Present address: Research Center for Agricultural Information Technology, National Agriculture and Food Research Organization, Chiyoda-ku, Tokyo 100-0013, Japan

\*Co-corresponding authors

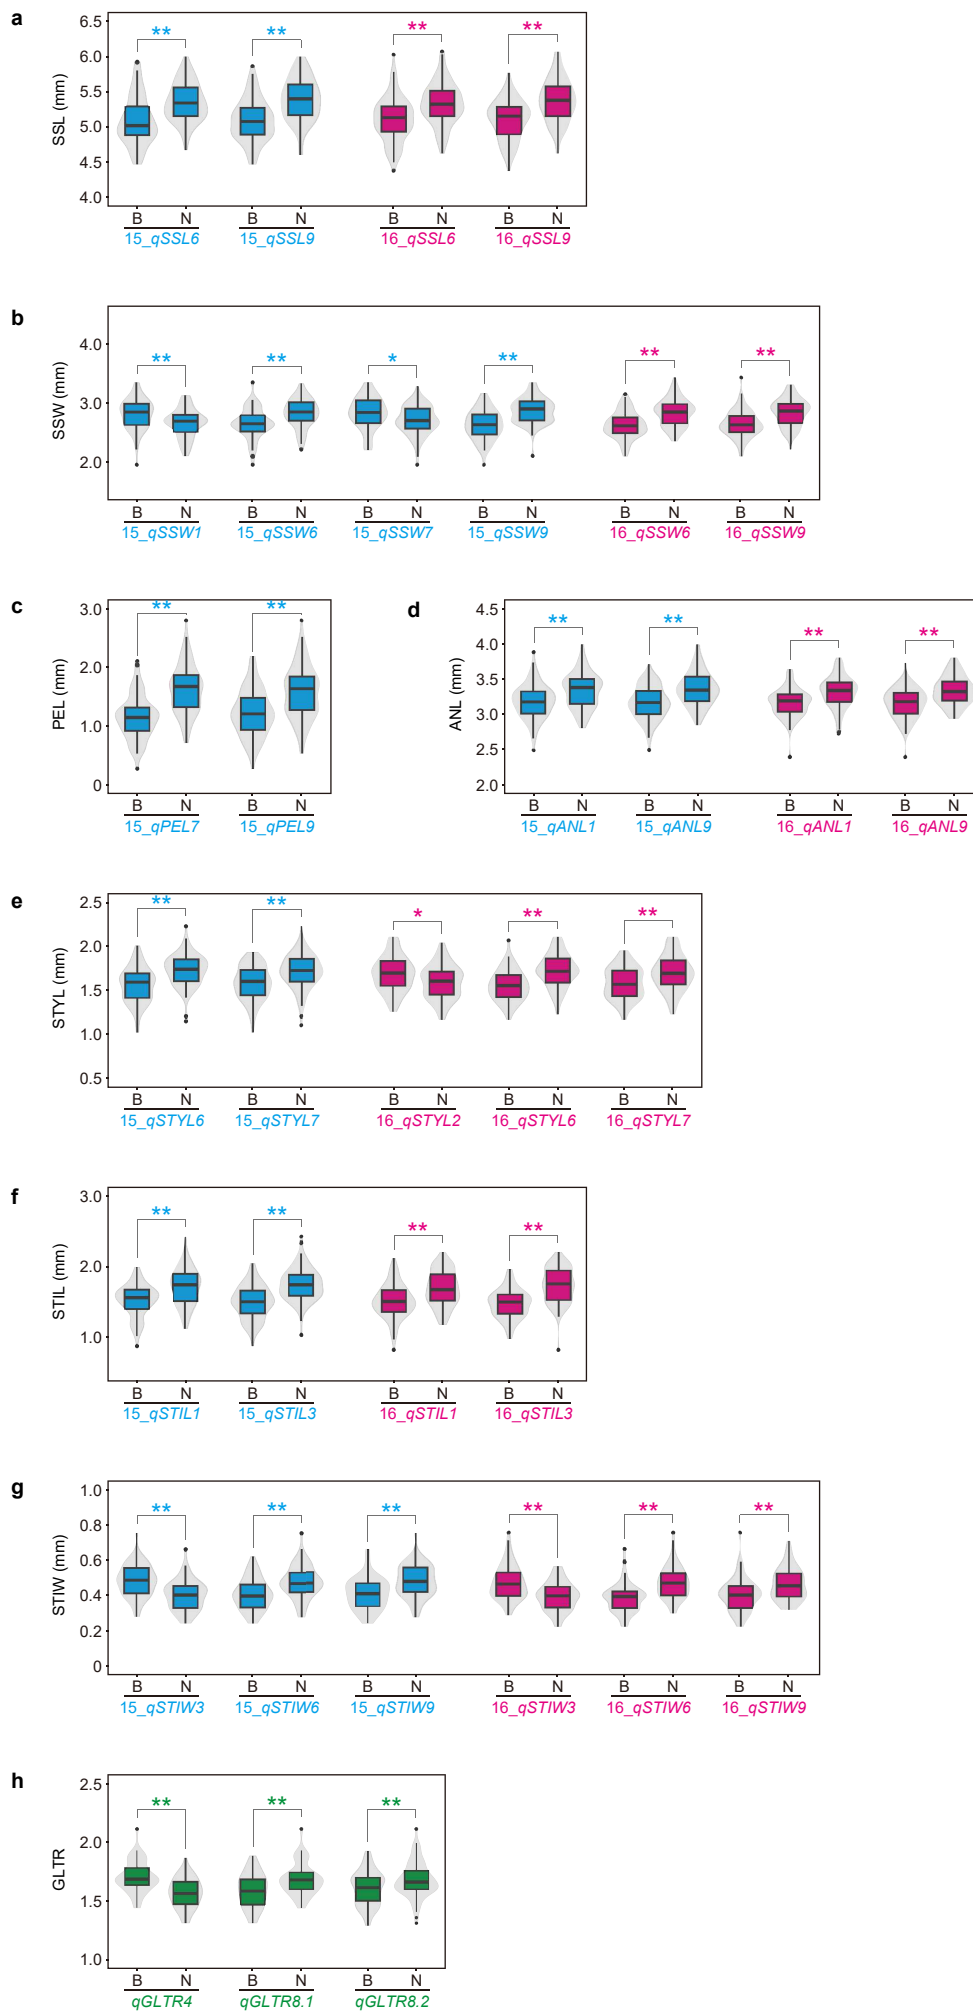

### Supplementary Figure S1

Box and violin plots show the effects of the nearest marker genotypes for each QTL. (a) Sessile spikelet length, (b) sessile spikelet width, (c) pedicel length, (d) anther length, (e) style length, (f) stigma length, and (g) stigma width. "15\_" or "16\_" indicate cultivation in 2015 or 2016. Asterisks indicate significant differences between genotypes (Welch' s t-test, \*P < 0.05, \*\*P < 0.005).

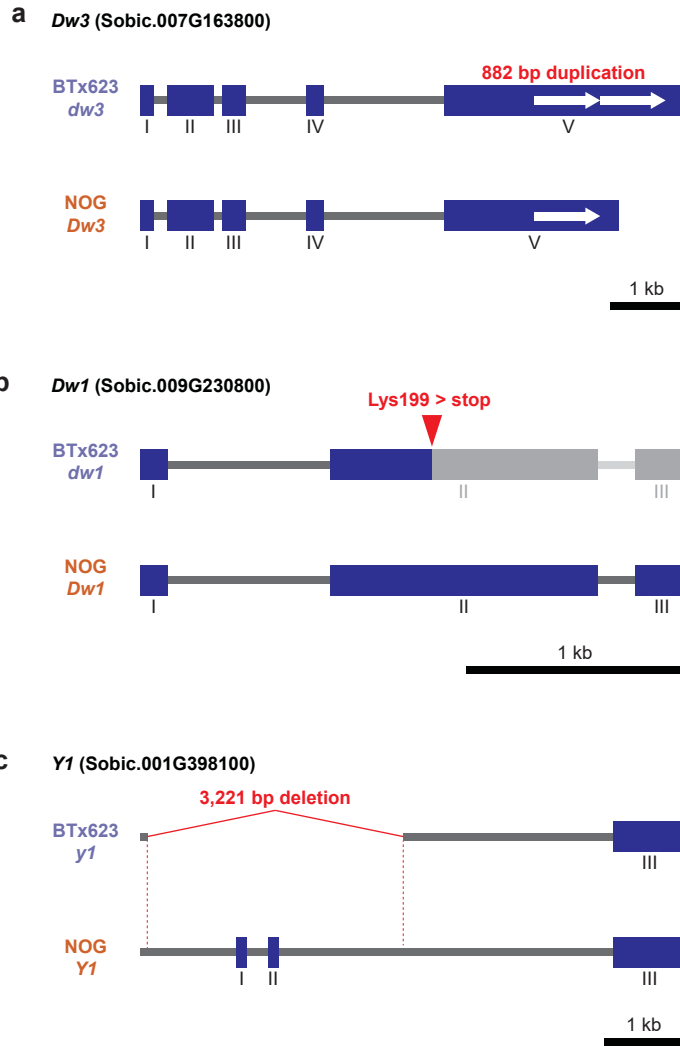

**Supplementary Figure S2**

The gene structures of *Dw3* (a), *Dw1* (b), and *Y1* (c) in NOG and their mutations in BTx623. Navy boxes represent coding exons. Primers used in study are listed in Supplementary Table S2.

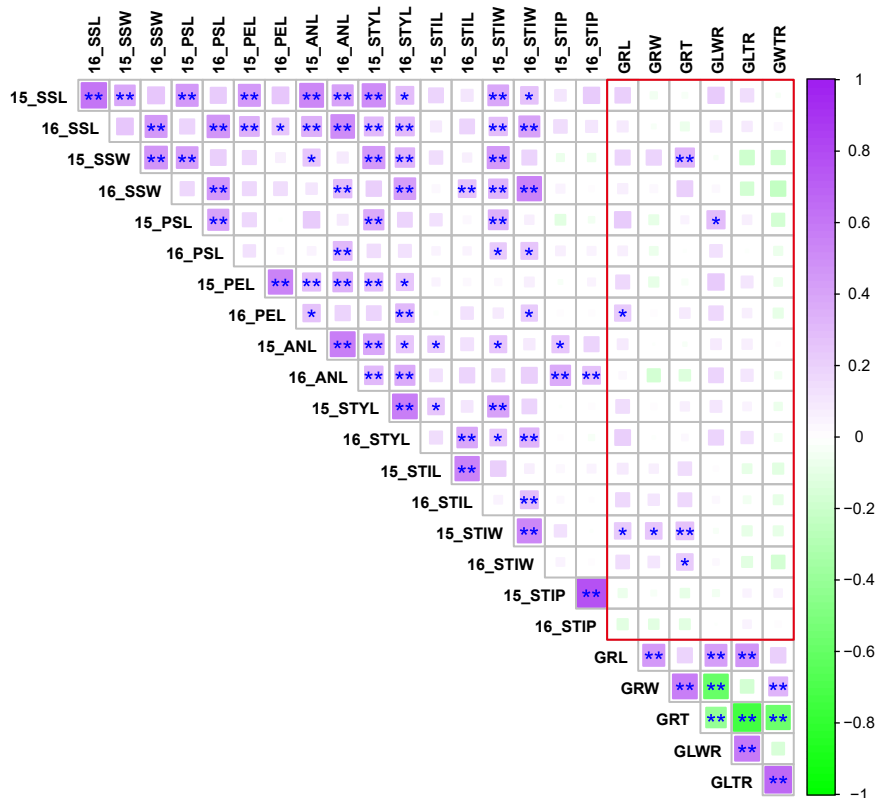

### Supplementary Figure S3

Phenotypic correlations for the nine spikelet-related and six grain-related traits measured in this study. Pearson's correlation coefficients for each trait measured in the RIL population. Purple and green colors represent positive and negative correlations ( $r$ ) between traits, respectively. SSL; sessile spikelet length, SSW; sessile spikelet width, PSL; pedicellate spikelet length, PEL; pedicel length, ANL; anther length, STYL; style length, STIL; stigma length, STIW; stigma width, STIP; stigma pigmentation, GRL; grain length, GRW; grain width, GRT; grain thickness, GLWR; grain length/width ratio, GLTR; grain length/thickness ratio, and GWTR; grain width/thickness ratio. For the spikelet-related traits, "15\_" or "16\_" indicate the results of 2015 or 2016. \* $P < 0.001$ , \*\* $P < 0.0001$ .

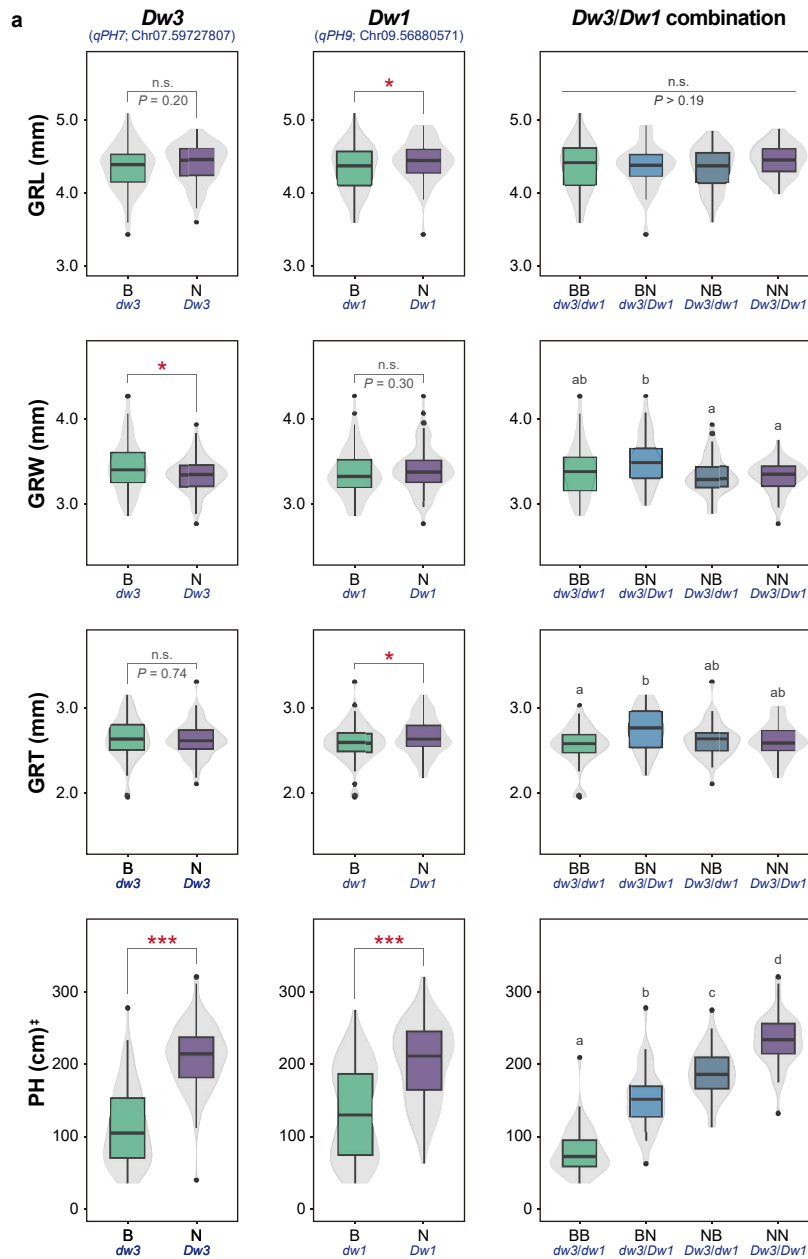

**b**

|                 | <i>dw3</i>        | <i>Dw3</i>        | Effect of <i>dw3</i> † | <i>dw1</i>        | <i>Dw1</i>        | Effect of <i>dw1</i> † |
|-----------------|-------------------|-------------------|------------------------|-------------------|-------------------|------------------------|
| <b>GRL (mm)</b> | 4.35<br>(0.31)    | 4.40<br>(0.26)    | 1.26% down             | 4.33<br>(0.32)    | 4.45<br>(0.27)    | 2.57% down             |
| <b>GRW (mm)</b> | 3.44<br>(0.30)    | 3.34<br>(0.20)    | 3.02% up               | 3.36<br>(0.27)    | 3.40<br>(0.26)    | 1.23% down             |
| <b>GRT (mm)</b> | 2.64<br>(0.25)    | 2.62<br>(0.20)    | 0.43% up               | 2.59<br>(0.22)    | 2.67<br>(0.22)    | 3.03% down             |
| <b>PH (cm)‡</b> | 113.99<br>(52.48) | 210.27<br>(43.42) | 45.79% down            | 135.35<br>(62.82) | 201.30<br>(54.92) | 32.76% down            |

### Supplementary Figure S4

Relationships between the dwarf genes (*Dw3* and *Dw1*) and grain size in sorghum. (a) Box and violin plots show the effects of the nearest marker genotypes of *Dw3* and *Dw1* to the grain-related traits (GRL; grain length, GRW; grain width, GRT; grain thickness) and plant height. Different letters denote significant differences according to the Tukey-Kramer test ( $P < 0.05$ ). Asterisks indicate significant differences between genotypes (Welch's t-test, \* $P < 0.05$ , \*\*\* $P < 0.0005$ ). (b) The table shows average values and standard deviations (SD, in parentheses) of the population with the mutated allele and that of the functional allele for each dwarf gene. †The ratio of the average value of the population with the mutated allele to that of the functional allele (%). ‡Data of the plant height (PH) were taken from the results obtained by our previous study using the same population (47).

Supplementary Table S1. QTL correspondence with other studies

| Chr | QTL cluster | QTLs detected in this study |       |         |                |                                   |            |               | Related QTLs reported in other studies |                              |                                   |                       |            |               |                             |
|-----|-------------|-----------------------------|-------|---------|----------------|-----------------------------------|------------|---------------|----------------------------------------|------------------------------|-----------------------------------|-----------------------|------------|---------------|-----------------------------|
|     |             | QTL ID <sup>a</sup>         | LOD   | PVE (%) | Nearest marker | Marker interval (bp) <sup>b</sup> |            | Interval (bp) | QTL ID <sup>c</sup>                    | Trait                        | Population                        | QTL (bp) <sup>d</sup> |            | Interval (bp) | Reference                   |
|     |             |                             |       |         |                | Start                             | end        |               |                                        |                              |                                   | Start                 | end        |               |                             |
| 1   | -           | 16_qANL1                    | 4.34  | 8.35    | Chr01.65134709 | 64,608,936                        | 65,571,022 | 962,086       | QPLEN1.10                              | Panicle length               | BTx623/IS3620C                    | 64,461,975            | 66,222,235 | 1,760,260     | Brown et al 2006            |
|     |             | 15_qSTIP1                   | 50.62 | 68.83   | Chr01.67767009 | 67,509,497                        | 68,618,079 | 1,108,582     | QDMGR1.16                              | Dry matter growth rate       | Diversity set (biomass) (n=194)   | 65,297,392            | 65,404,496 | 107,104       | Fiedler et al 2014          |
|     |             | 15_qSSW1                    | 6.31  | 9.81    | Chr01.73492838 | 72,086,062                        | 74,542,240 | 2,456,178     | QGCOL1.39                              | Grain color                  | R890562/ICSV745                   | 67,939,567            | 68,014,675 | 75,108        | Mace and Jordan 2010        |
|     |             | 15_qANL1                    | 5.10  | 9.48    | Chr01.78907937 | 77,228,064                        | 79,222,517 | 1,994,453     | QGPR1.19                               | Proanthocyanidins            | Diverse set                       | 68,038,010            | 68,077,541 | 39,531        | Rhodes et al 2014           |
|     |             | 15_qSTIL1                   | 5.76  | 9.64    | Chr01.80075044 | 78,907,937                        | 80,451,024 | 1,543,087     | QFBMS1.6                               | Fresh biomass                | Shihong137/L-Tian                 | 71,558,611            | 74,007,396 | 2,448,785     | Guan et al 2011             |
|     |             | 15_qSTIL1                   | 5.76  | 9.64    | Chr01.80075044 | 78,907,937                        | 80,451,024 | 1,543,087     | QGWGT1.21                              | Grain weight                 | Sorghum Association Panel (SAP)   | 73,957,746            | 74,039,407 | 81,661        | Boyles et al 2016           |
|     |             | 15_qSTIL1                   | 5.76  | 9.64    | Chr01.80075044 | 78,907,937                        | 80,451,024 | 1,543,087     | QPWTH1.3                               | Panicle width                | BTx623/IS3620C                    | 74,422,759            | 74,824,330 | 401,571       | Hart et al 2001             |
| 2   | -           | 16_qSTYL2                   | 5.35  | 8.71    | Chr02.67908557 | 67,181,119                        | 68,205,478 | 1,024,359     | QLFLN1.4                               | Leaf length                  | Red Kafir/Takakibi (F2)           | 77,174,548            | 80,878,678 | 3,704,130     | Shehzad and Okuno 2015      |
|     |             | 16_qSTYL2                   | 5.35  | 8.71    | Chr02.67908557 | 67,181,119                        | 68,205,478 | 1,024,359     | QPLEN1.30                              | Panicle length               | Red Kafir/Takakibi (F2)           | 77,174,548            | 80,878,678 | 3,704,130     | Shehzad and Okuno 2015      |
| 3   | -           | 15_qSTIW3                   | 9.59  | 14.51   | Chr03.1014391  | 196,942                           | 1,842,334  | 1,645,392     | QPWTH1.9                               | Panicle width                | Diverse set                       | 77,687,776            | 79,617,065 | 1,929,289     | Zhang et al 2015            |
|     |             | 15_qSTIL3                   | 12.71 | 23.14   | Chr03.73116039 | 72,187,849                        | 73,272,999 | 1,085,150     | QFBMS1.14                              | Fresh biomass                | Shihong137/L-Tian                 | 78,949,693            | 80,878,678 | 1,928,985     | Wang et al 2016             |
| 6   | QC6         | 15_qPSL6                    | 6.50  | 16.87   | Chr06.46819000 | 45,449,430                        | 47,716,228 | 2,266,798     | QHGHT2.8                               | Height (plant height)        | Nested Association Mapping set US | 66,467,661            | 67,569,058 | 1,101,397     | Bouchet et al 2017          |
|     |             | 16_qSSW6                    | 6.59  | 12.13   | Chr06.47921285 | 47,546,161                        | 48,677,734 | 1,131,573     | QPLEN2.17                              | Panicle length               | Diversity research set (n=107)    | 68,082,309            | 68,502,429 | 420,120       | Sakhi et al 2013            |
|     |             | 15_qSTIW6                   | 6.35  | 9.24    | Chr06.48086748 | 47,740,711                        | 49,157,376 | 1,416,665     | QSLN3.2                                | Shoot length                 | Sorghum Association Panel (SAP)   | 757,282               | 1,882,419  | 1,125,137     | Chopra et al 2017           |
|     |             | 16_qSTYL6                   | 9.42  | 16.12   | Chr06.48086748 | 47,921,285                        | 48,677,734 | 756,449       | QPLEN3.1                               | Panicle length               | Sorghum Association Panel (SAP)   | 838,142               | 1,887,393  | 1,049,251     | Morris et al 2013           |
|     |             | 16_qSSL6                    | 3.92  | 7.09    | Chr06.48677734 | 48,086,748                        | 50,250,487 | 2,163,739     | QSTHK3.20                              | Stem circumference           | Sorghum Association Panel (SAP)   | 71,997,455            | 72,258,061 | 260,606       | Zhao et al 2016             |
|     |             | 16_qPSL6                    | 5.34  | 11.73   | Chr06.49336636 | 48,086,748                        | 50,331,377 | 2,244,629     | QHGHT6.48                              | Height (plant height)        | FamilyD: SC1038/(Landrace)BTx40   | 45,391,187            | 45,542,964 | 151,777       | Higgins et al 2014          |
| 7   | QC7         | 15_qPEL7                    | 11.38 | 24.21   | Chr07.59727807 | 59,407,685                        | 60,042,098 | 634,413       | QPLEN6.7                               | Panicle length               | M35-1/B35                         | 46,063,454            | 46,863,224 | 799,770       | Reddy et al 2013            |
|     |             | 15_qSTYL7                   | 6.69  | 12.36   | Chr07.59727807 | 59,407,685                        | 60,042,098 | 634,413       | QHGHT6.52                              | Height (plant height)        | 296B/IS18551                      | 46,449,918            | 47,615,779 | 1,165,861     | Madhusudhana and Patil 2013 |
|     |             | 15_qSSW7                    | 4.63  | 7.03    | Chr07.64706648 | 63,878,301                        | 65,440,280 | 1,561,979     | QHGHT6.57                              | Height (plant height)        | 296B/IS18551                      | 47,028,784            | 48,266,492 | 1,237,708     | Madhusudhana and Patil 2013 |
|     |             | 15_qPEL7                    | 11.38 | 24.21   | Chr07.59727807 | 59,407,685                        | 60,042,098 | 634,413       | QFBMS6.1                               | Fresh biomass                | Shihong137/L-Tian                 | 47,686,626            | 50,991,177 | 3,304,551     | Wang et al 2014b            |
| 9   | QC9         | 16_qSSW9                    | 6.83  | 12.62   | Chr09.56571248 | 55,806,970                        | 57,681,027 | 1,874,057     | QPLEN6.12                              | Panicle length               | 654/LTR108                        | 48,090,340            | 50,925,400 | 2,835,060     | Zou et al 2012              |
|     |             | 16_qSTIW9                   | 7.63  | 11.69   | Chr09.57166357 | 56,467,290                        | 57,681,027 | 1,213,737     | QHGHT6.88                              | Height (plant height)        | Nested Association Mapping set US | 49,724,186            | 50,568,221 | 844,035       | Bouchet et al 2017          |
|     |             | 16_qSSL9                    | 8.87  | 17.03   | Chr09.57166357 | 56,467,290                        | 57,917,278 | 1,449,988     | QPLEN6.1                               | Panicle length               | Diversity research set (n=107)    | 49,774,659            | 50,674,052 | 899,393       | Witt Hmon et al 2014        |
| 9   | QC9         | 16_qANL9                    | 5.92  | 11.60   | Chr09.57166357 | 56,571,248                        | 57,917,278 | 1,346,030     | QHGHT7.72                              | Height (plant height)        | Shihong137/L-Tian                 | 58,858,415            | 59,547,856 | 689,441       | Srinivas et al 2009         |
|     |             | 16_qPEL9                    | 5.12  | 9.93    | Chr09.57599415 | 56,571,248                        | 58,014,412 | 1,443,164     | QHGHT7.28                              | Height (plant height)        | BTx623/Rio                        | 59,100,515            | 59,540,617 | 440,102       | Murray et al 2008           |
|     |             | 16_qSSW9                    | 6.83  | 12.62   | Chr09.56571248 | 55,806,970                        | 57,681,027 | 1,874,057     | QHGHT7.75                              | Height (plant height)        | Nested Association Mapping set US | 59,529,297            | 59,532,773 | 3,476         | Bouchet et al 2017          |
|     |             | 16_qSTIW9                   | 7.63  | 11.69   | Chr09.57166357 | 56,467,290                        | 57,681,027 | 1,213,737     | QPLEN7.16                              | Panicle length               | M35-1/B35                         | 63,191,529            | 65,460,255 | 2,268,726     | Reddy et al 2013            |
| 9   | QC9         | 16_qANL9                    | 5.92  | 11.60   | Chr09.57166357 | 56,571,248                        | 57,917,278 | 1,346,030     | QGYLD7.3                               | Grain yield                  | M35-1/B35                         | 63,221,926            | 65,460,255 | 2,238,329     | Reddy et al 2013            |
|     |             | 16_qPEL9                    | 5.12  | 9.93    | Chr09.57599415 | 56,571,248                        | 58,014,412 | 1,443,164     | QHGHT9.30                              | Height (plant height)        | BTx3197/Rio                       | 55,353,960            | 57,947,320 | 2,593,360     | Felderhoff et al 2012       |
| 9   | QC9         | 16_qANL9                    | 5.92  | 11.60   | Chr09.57166357 | 56,571,248                        | 57,917,278 | 1,346,030     | QHGHT9.19                              | Height (plant height)        | IS8525/R931945-2-2                | 55,625,467            | 57,924,294 | 2,298,827     | Wang et al 2014a            |
|     |             | 16_qPEL9                    | 5.12  | 9.93    | Chr09.57599415 | 56,571,248                        | 58,014,412 | 1,443,164     | QHGHT9.11                              | Height (preflag leaf height) | Sorghum Association Panel (SAP)   | 56,779,950            | 57,194,940 | 414,990       | Brown et al 2008            |
| 9   | QC9         | 16_qANL9                    | 5.92  | 11.60   | Chr09.57166357 | 56,571,248                        | 57,917,278 | 1,346,030     | QHGHT9.12                              | Height (plant height)        | ICSV745/R890562-1-2               | 56,942,211            | 57,292,395 | 350,184       | Wang et al 2014a            |
|     |             | 16_qPEL9                    | 5.12  | 9.93    | Chr09.57599415 | 56,571,248                        | 58,014,412 | 1,443,164     | QHGHT9.31                              | Height (plant height)        | MS138B/74LH3213                   | 57,091,740            | 57,916,828 | 825,088       | Takai et al 2012            |

<sup>a</sup>When overlapped QTLs were detected between years, the one with the smallest marker interval was described as the representative QTL. <sup>b</sup>Marker intervals were estimated based on confidence intervals (2.0-LOD). <sup>c</sup>QTL ID provided by QTL atlas (<https://aussorgm.org.au/sorghum-qtl-atlas/>). <sup>d</sup>QTL positions estimated by QTL atlas.

**Supplementary Table S2. Primers used in this study**

| Primer name         | Sequence                    | Comment                                       |                               |
|---------------------|-----------------------------|-----------------------------------------------|-------------------------------|
| Dw1-F               | TGTCTTCCCTTCCAGATGCG        | Used to amplify entire Dw1                    |                               |
| Dw1-R               | CTCCTGCGAACGATTGGAGT        |                                               |                               |
| Dw1-SeqF1           | CGAGCACGCAAACCCTAACT        | Sequencing of Dw1                             |                               |
| Dw1-SeqR1           | TCTGACAGAAGCAACCAAGCA       |                                               |                               |
| Dw1-SeqF2           | CAATCGGGCTTGGGCTTTAG        |                                               |                               |
| Dw1-SeqR2           | AGCGTGTGTTAGTCCAAGCA        |                                               |                               |
| Dw1-SeqF3           | GGGGCAAAAAGCTTTTACACCT      |                                               |                               |
| Dw1-SeqR3           | ATTAGACGTTGGACCGCCAG        |                                               |                               |
| Dw1-SeqF4           | CCTGCAGCACGTACTTCTGA        |                                               |                               |
| Dw1-SeqR4           | GTCTTCCAATGGGCAGGAGG        |                                               |                               |
| Dw1-SeqF5           | TCTGGTGGTTCAGGACTCCA        |                                               |                               |
| Dw1-SeqR5           | GCCATCTTTAGCGTAGGCAC        |                                               |                               |
| Dw1-SeqF6           | CAGCGCATCTGCTCAATTC         | Sequencing of Dw3 from exon I to IV           |                               |
| Dw1-SeqR6           | CTGAGCAAGAATGGCCAGGA        |                                               |                               |
| Dw1-SeqF7           | CGCTTGGACGTGTTCAAAGG        |                                               |                               |
| Dw1-SeqR7           | CAGCCTACATCATCAGTAAGACCA    |                                               |                               |
| Dw3-F1              | GGCTCTCCTGTTCTTCCGTC        |                                               | Used to amplify entire Dw3    |
| Dw3-R1              | TGGTGCAGCGGTTCTACGAG        |                                               |                               |
| Dw3-F2              | CTACTTACCGTCTTCTGCTGCTA     |                                               | Sequencing of Dw3 from exon V |
| Dw3-R2              | ACTTACAAGGAAGGATCAATTCCCA   |                                               |                               |
| Dw3-F3              | ACTACATGGCCACCTTCGTG        |                                               |                               |
| Dw3-R3              | CATGCACTACCTTCATTTTTCTGGT   |                                               |                               |
| Dw3-Seq1F           | GCCAAGCTCTCCTCCAGGA         |                                               |                               |
| Dw3-Seq1R           | CGACGGGTACGCGAAGTC          |                                               |                               |
| Dw3-Seq2F           | TCTGTGTGTGTGGATCGC          |                                               |                               |
| Dw3-Seq2R           | GCTCCAAGCATTCACTTCTTCA      |                                               |                               |
| Dw3-Seq3F           | TCGAGAGGTTCTACGACCCC        |                                               |                               |
| Dw3-Seq3R           | GCAAAATCGATACGGCAGCA        |                                               |                               |
| Dw3-Seq4F           | TGGTCATGCATTCACACAGC        | Sequencing of Dw3 exon V                      |                               |
| Dw3-Seq4R           | CAGCAGCAGGTTCTCCTTGA        |                                               |                               |
| Dw3-Seq5F           | TTGAGCCTTGACCGACTGAC        |                                               |                               |
| Dw3-Seq5R           | GCGACGCATGAATGGAGATG        |                                               |                               |
| Dw3-Seq6F           | CACGCAGGTCCGTATCGTAT        |                                               |                               |
| Dw3-Seq6R           | CCATTCATCTCCCTCTGCCC        |                                               |                               |
| Dw3-Seq7F           | AGGGATGGGAGAGCAATTGC        |                                               |                               |
| Dw3-Seq7R           | TGTGGCCCATATCCCATGTG        |                                               |                               |
| Dw3-Seq8F           | TGATCCCAGTGCAAGCAAGA        |                                               |                               |
| Dw3-Seq8R           | AGTACCACTCCTCCAGCATA        |                                               |                               |
| Dw3-Seq9F           | TGGTCGAAATTGACGAGACGA       | Sequencing of Dw3 exon V                      |                               |
| Dw3-Seq9R           | GGATCAGCTTGGCGTAGGGT        |                                               |                               |
| Dw3-Seq10F          | TCTTTTGAACCTAGTTAGTCTTTGATT |                                               |                               |
| Dw3-Seq10R          | GGTGCCCATCTCGGAGAC          |                                               |                               |
| Dw3-Seq11F          | GGGCAGAAGCAGCGCATC          |                                               |                               |
| Dw3-Seq11R          | GTAGTAGACGCTGAGCACGG        |                                               |                               |
| Dw3-Seq12F          | CCTCTCCGACTTCTCCACCT        |                                               |                               |
| Dw3-Seq12R          | ACATCTTCTGCAGGACGGTG        |                                               |                               |
| Dw3-Seq13F          | GTGTGCGCGAGAAGATGTTT        |                                               |                               |
| Dw3-Seq13R          | CGTTTTCCGGTCGATGGTCT        |                                               |                               |
| Dw3-Seq14F          | CAAGATCACGGGGCTCTTTCG       | Sequencing of Dw3 exon V                      |                               |
| Dw3-Seq14R          | ATGATGGCCCGCCTGCTTC         |                                               |                               |
| Dw3-Seq15F          | GTTCTACGAGCCCACGTCC         |                                               |                               |
| Dw3-Seq15R          | CGTTTTCCGGTCGATGGTCT        |                                               |                               |
| Dw3-Seq16F          | CTTCTGGAAGGGGCAGATCG        |                                               |                               |
| Dw3-Seq16R          | GCAGCGCCGAGATGAACC          |                                               |                               |
| Dw3-Seq17F          | GTTCTACGAGCCCACGTCC         |                                               |                               |
| Dw3-Seq17R          | GCTTCAGCTTCTCATCCATC        |                                               |                               |
| Dw3-Seq18F          | CTCAAGCACCATCCCGACG         |                                               |                               |
| Dw3-Seq18R          | TCTGCCGCTGAAAATCGAGA        |                                               |                               |
| Y1-F1*              | ACACACTGCGAGCTGAGAG         | Used to amplify Y1 from exon I to exon II     |                               |
| Y1-R1*              | GACGTCGGCCCCAAGGTAGTTGATCC  |                                               |                               |
| Y1-F2*              | CAAGAACTACTGGAATTCGCACCT    | Used to amplify Y1 exon III                   |                               |
| Y1-R2*              | AGTACAGTACATGTGAAGAAG       |                                               |                               |
| Sobic.004G237000_Fw | GTCCACACACACACCTTC          | Used to amplify and sequence Sobic.004G237000 |                               |
| Sobic.004G237000_Rv | AGGAGCTAAAGTGAGGAGGC        |                                               |                               |
| Sobic.004G247000_Fw | AGGTCGAGTAGGGTGTAGGT        | Used to amplify and sequence Sobic.004G247000 |                               |
| Sobic.004G247000_Rv | CCACCCACTAACCATTCCCT        |                                               |                               |
| Sobic.004G247000_S1 | GTTACTACAAACACGCTTTG        | Used to sequence Sobic.004G247000             |                               |
| Sobic.004G247000_S2 | ACCTAGTTAGTACATGATTG        |                                               |                               |
| Sobic.004G247000_S3 | AATAATAATAGGGACCCTC         |                                               |                               |
| Sobic.004G247700_Fw | TCAGCCAAATGTCCAGACCT        | Used to amplify and sequence Sobic.004G247700 |                               |
| Sobic.004G247700_Rv | CACCCCTGTAGATCGATCGA        |                                               |                               |
| MSD2_Fw             | GTCCTCACTTGTCCCAGTC         | Used to amplify and sequence MSD2             |                               |
| MSD2_Rv             | ATCGGTACCGCGAGAGACTA        |                                               |                               |
| MSD2_S2             | ATTTTACTTACGCCTGGCG         | Used to sequence MSD2                         |                               |
| MSD2_S3             | CTAACATTTTCGTCACGCACG       |                                               |                               |
| MSD2_S4             | CCACTGCTCGCTCATCTCAC        |                                               |                               |
| MSD2_S5             | CAGATCAATCAATCACATGA        |                                               |                               |

\*Y1 alleles for BTx623 and NOG were checked using previously reported primers (Ibraheem *et al.* 2010)
